# Supplementary material
Source: PubMed Central journal article supplement (PMC10141272)
Supplement: jamaoncol-e230181-s001.pdf [file jamaoncol-e230181-s001.pdf]

## Supplemental Online Content

Waks AG, Ogayo ER, Paré L, et al. Assessment of the HER2DX assay in patients with *ERBB2*-positive breast cancer treated with neoadjuvant paclitaxel, trastuzumab, and pertuzumab. *JAMA Oncol*. Published online April 27, 2023.  
doi:10.1001/jamaoncol.2023.0181

**eTable 1.** Main patient population of the DAPHNe trial cohort and HER2DX sub-population

**eTable 2.** HER2DX pCR likelihood score and residual cancer burden (RCB) category

**eTable 3.** HER2DX pCR likelihood score and hormone receptor (HR) IHC status

**eFigure.** Consort diagram

This supplemental material has been provided by the authors to give readers additional information about their work.

eTable 1. Main patient population of the DAPHNe trial cohort and HER2DX sub-population.

|                                                  | HER2DX sub-population |       | Original trial population |       |
|--------------------------------------------------|-----------------------|-------|---------------------------|-------|
|                                                  | N                     | %     | N                         | %     |
| <b>N</b>                                         | 80                    | -     | 98                        | -     |
| <b>Age (mean and range)</b>                      | 50.3 (26-78)          |       | 49.5 (24-78)              |       |
| <b>Clinical tumor stage</b>                      |                       |       |                           |       |
| cT1                                              | 15                    | 18.7% | 18                        | 18.4% |
| cT2-3                                            | 65                    | 81.3% | 80                        | 81.6% |
| <b>Clinical nodal stage</b>                      |                       |       |                           |       |
| cN0                                              | 52                    | 65.0% | 65                        | 66.3% |
| cN1-3                                            | 28                    | 35.0% | 33                        | 36.7% |
| <b>Pathological response (breast and axilla)</b> |                       |       |                           |       |
| pCR                                              | 48                    | 60.0% | 55                        | 56.7% |
| Residual disease                                 | 32                    | 40.0% | 42                        | 43.3% |
| <b>Hormone receptor status</b>                   |                       |       |                           |       |
| Positive                                         | 56                    | 70.0% | 65                        | 66.3% |
| Negative                                         | 24                    | 30.0% | 33                        | 33.7% |

Abbreviations: pCR, pathologic complete response.

eTable 2: HER2DX pCR likelihood score and residual cancer burden (RCB) category.

|                             | RCB-0      | RCB-I     | RCB-II     | RCB-III  |
|-----------------------------|------------|-----------|------------|----------|
| HER2DX pCR high<br>(n=27)   | 25 (92.6%) | 1 (3.7%)  | 1 (3.7%)   | 0        |
| HER2DX pCR medium<br>(n=22) | 14 (63.6%) | 3 (13.6%) | 5 (22.7%)  | 0        |
| HER2DX pCR low<br>(n=31)    | 9 (29.0%)  | 1 (3.2%)  | 19 (61.3%) | 2 (6.5%) |

Abbreviations: RCB, residual cancer burden.

eTable 3. HER2DX pCR likelihood score and hormone receptor (HR) IHC status

| <b>HER2DX pCR likelihood score group</b> | <b>HR IHC Status</b> | <b>N (%)</b> | <b>pCR Rate</b> |
|------------------------------------------|----------------------|--------------|-----------------|
| High                                     | HR+                  | 9 (11.2%)    | 88.9%           |
| High                                     | HR-                  | 18 (22.5%)   | 94.4%           |
| Medium                                   | HR+                  | 17 (21.2%)   | 58.8%           |
| Medium                                   | HR-                  | 5 (6.2%)     | 80.0%           |
| Low                                      | HR+                  | 30 (37.6%)   | 30.0%           |
| Low                                      | HR-                  | 1 (1.2%)     | 0%              |

Abbreviations: IHC, immunohistochemistry; pCR, pathologic complete response.

eFigure. Consort diagram.

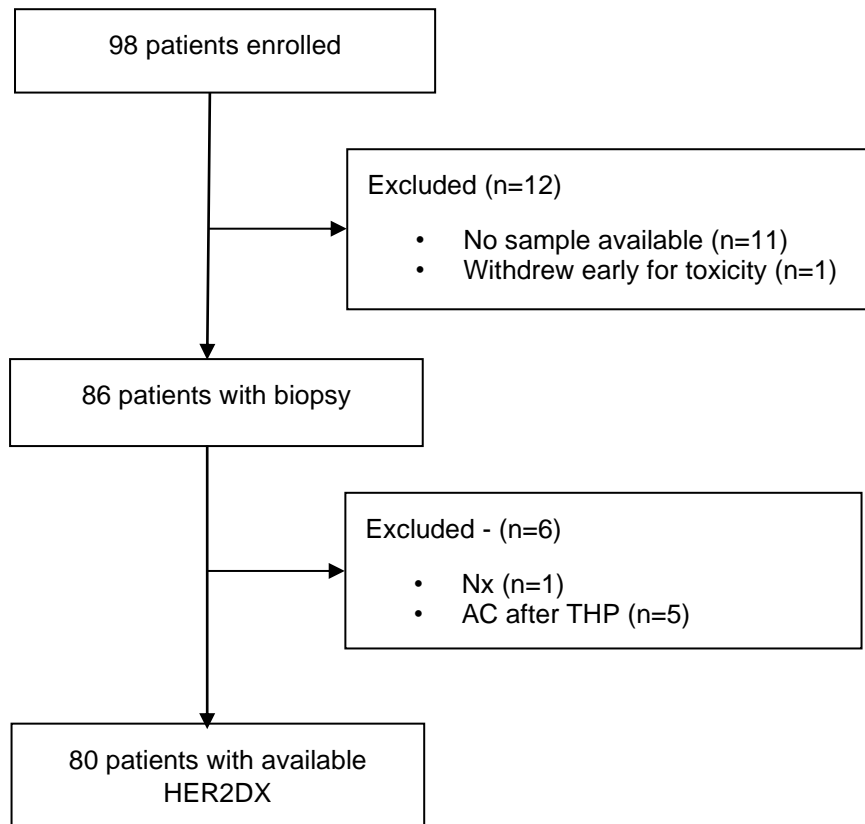

Abbreviations: AC, doxorubicin + cyclophosphamide; Nx, unknown nodal status.
