# Supplementary material
Source: PubMed Central journal article supplement (PMC10141272)
Supplement: jamaoncol-e230181-s002.pdf [file jamaoncol-e230181-s002.pdf]

## Data Sharing Statement

Waks. Assessment of the HER2DX Assay in Patients With ERBB2-Positive Breast Cancer Treated With Neoadjuvant Paclitaxel, Trastuzumab, and Pertuzumab. *JAMA Oncol.* Published April 27, 2023. doi:10.1001/jamaoncol.2023.0181

### Data

**Data available:** Yes

**Data types:** Deidentified participant data

**How to access data:** [emittendorf@bwh.harvard.edu](mailto:emittendorf@bwh.harvard.edu)

**When available:** With publication

### Supporting Documents

**Document types:** Other (please specify)

**Additional Information:** Protocol

**How to access documents:** [emittendorf@bwh.harvard.edu](mailto:emittendorf@bwh.harvard.edu)

**When available:** With publication

### Additional Information

**Who can access the data:** Proposals for any purpose will be considered.

**Types of analyses:** Proposals for any purpose will be considered.

**Mechanisms of data availability:** Proposals for any purpose will be considered.
